# Supplementary material for: Different Cropping Patterns to Restore Saline-Alkali Soils in Northeast China Affect the Abundance of Functional Genes in the Soil Nitrogen Cycle
Source: MDPI journal article supplement (doi:10.3390/su15086592), 2023-04-13
Supplement: s1 [file s1]

Table S1. Summary of genes investigated, the enzymes they encode, and their function in the nitrogen cycle.

Table S2. PCR primers used for quantitative PCR and reaction conditions.

Table S1

|             | Enzyme                                 | Process (es)              | Details                                                                   |
|-------------|----------------------------------------|---------------------------|---------------------------------------------------------------------------|
| <i>nifH</i> | Nitrogenase                            | Nitrogen fixation         | Reduction of N <sub>2</sub> to NH <sub>4</sub> <sup>+</sup>               |
| <i>amoA</i> | Ammonia monooxygenase                  | Aerobic ammonia oxidation | Oxidation of NH <sub>4</sub> <sup>+</sup> to NH <sub>2</sub> OH           |
| <i>nxrB</i> | Nitrite oxidoreductase enzyme          | Nitrification             | Oxidation of NO <sub>2</sub> <sup>-</sup> to NO <sub>3</sub> <sup>-</sup> |
| <i>narG</i> | NO <sub>3</sub> <sup>-</sup> reductase | Denitrification           | Reduction of NO <sub>3</sub> <sup>-</sup> to NO <sub>2</sub> <sup>-</sup> |
| <i>norB</i> | NO reductase                           | Denitrification           | Reduction of NO to N <sub>2</sub> O                                       |
| <i>nosZ</i> | N <sub>2</sub> O reductase             | Denitrification           | Reduction of N <sub>2</sub> O to N <sub>2</sub>                           |

Table S2

| Target gene     | Primers    | Primer Sequence                   | Reaction                                                                                             | Cycling conditions                           | Reference |
|-----------------|------------|-----------------------------------|------------------------------------------------------------------------------------------------------|----------------------------------------------|-----------|
| <i>nifH</i>     | nifH-F     | 5'-AAAGGYGGWATCGGYAARTCCACCAC-3'  | 16.5 µL of 2 X ChamQ SYBR® Color qPCR Master MixTM, 2 µL of DNA template, and 0.8 µL of each primer. | 95°C-5 min.; 40x 95°C-5s, 55°C-30s, 72°C-40s | [1]       |
|                 | nifH-R     | 5'-TTGTTSGCSGCRTACATSGCCATCAT-3'  |                                                                                                      |                                              |           |
| AOA <i>amoA</i> | Arch-amoAF | 5'-STAATGGTCTGGCTTAGACG-3'        | 16.5 µL of 2 X ChamQ SYBR® Color qPCR Master MixTM, 2 µL of DNA template, and 0.8 µL of each primer. | 95°C-5 min.; 40x 95°C-5s, 58°C-30s, 72°C-40s | [2]       |
|                 | Arch-amoAR | 5'-GCGGCCATCCATCTGTATGT-3'        |                                                                                                      |                                              |           |
| AOB <i>amoA</i> | AmoA-1F    | 5'-GGGGTTTCTACTGGTGGT-3'          | 16.5 µL of 2 X ChamQ SYBR® Color qPCR Master MixTM, 2 µL of DNA template, and 0.8 µL of each primer. | 95°C-5 min.; 40x 95°C-5s, 58°C-30s, 72°C-40s | [3]       |
|                 | AmoA-2R    | 5'-CCCCTCKGSAAAGCCTTCTTC-3'       |                                                                                                      |                                              |           |
| <i>norB</i>     | norB-F     | 5'-AAATGGCTTTACGTCATCGTCG-3'      | 16.5 µL of 2 X ChamQ SYBR® Color qPCR Master MixTM, 2 µL of DNA template, and 0.8 µL of each primer. | 95°C-5 min.; 40x 95°C-5s, 60°C-30s, 72°C-40s | [4]       |
|                 | norB-R     | 5'-TCTGCGTGCCGTGGGTGT-3'          |                                                                                                      |                                              |           |
| <i>nosZ</i>     | nosZ-F     | 5'-CGYTGTTCMTCGACAGCCAG-3'        | 16.5 µL of 2 X ChamQ SYBR® Color qPCR Master MixTM, 2 µL of DNA template, and 0.8 µL of each primer. | 95°C-5 min.; 40x 95°C-5s, 60°C-30s, 72°C-40s | [4]       |
|                 | nosZ-R     | 5'-CATGTGCAGNGCRTGGCAGAA-3'       |                                                                                                      |                                              |           |
| <i>narG</i>     | narG-f     | 5'- TCGCCSATYCCGGCSATGTC-3'       | 16.5 µL of 2 X ChamQ SYBR® Color qPCR Master MixTM, 2 µL of DNA template, and 0.8 µL of each primer. | 95°C-5 min.; 40x 95°C-5s, 65°C-30s, 72°C-40s | [5]       |
|                 | narG-r     | 5'- GAGTTGTACCAGTCRGC SGAYTCSG-3' |                                                                                                      |                                              |           |
| <i>nxB</i>      | nxB-F      | 5'- TACATGTGGTGGAACA-3'           | 16.5 µL of 2 X ChamQ SYBR® Color qPCR Master MixTM, 2 µL of DNA template, and 0.8 µL of each primer. | 95°C-5 min.; 40x 95°C-5s, 50°C-30s, 72°C-40s | [6]       |
|                 | nxB-R      | 5'- CGGTTCTGGTTCRATCA-3'          |                                                                                                      |                                              |           |

## REFERENCES

1. Fan, K., et al., *Suppressed N fixation and diazotrophs after four decades of fertilization*. Microbiome, 2019. **7**(1).
2. Meinhardt, K.A., et al., *Evaluation of revised polymerase chain reaction primers for more inclusive quantification of ammonia-oxidizing archaea and bacteria*. Environmental Microbiology Reports, 2015. **7**(2): p. 354-363.
3. Wang, J., et al., *Ammonia oxidizer abundance in paddy soil profile with different fertilizer regimes*. Applied Soil Ecology, 2014. **84**: p. 38-44.
4. Cassman, N.A., et al., *Nitrification inhibitors effectively target N<sub>2</sub>O-producing Nitrosospora spp. in tropical soil*. Environmental Microbiology, 2019. **21**(4): p. 1241-1254.
5. Bru, D., A. Sarr, and L. Philippot, *Relative abundances of proteobacterial membrane-bound and periplasmic nitrate reductases in selected environments*. Applied and Environmental Microbiology, 2007. **73**(18): p. 5971-5974.
6. Wang, J.P., et al., *The short- and long-term effects of formic acid on rapid nitrification start-up*. Environment International, 2020. **135**.
